# Supplementary material for: Novel pH-Responsive Cubosome and Hexosome Lipid Nanocarriers of SN-38 Are Prospective for Cancer Therapy
Source: MDPI journal article supplement (doi:10.3390/pharmaceutics14102175), 2022-10-12
Supplement: s1 [file s1]

## Supplementary Information

# Novel pH-responsive cubosome and hexosome lipid nanocarriers of SN-38 are prospective for cancer therapy

Sarigama Rajesh, Jiali Zhai, Calum J. Drummond\*, Nhiem Tran\*

*School of Science, STEM College, RMIT University, Melbourne, VIC 3000, Australia*

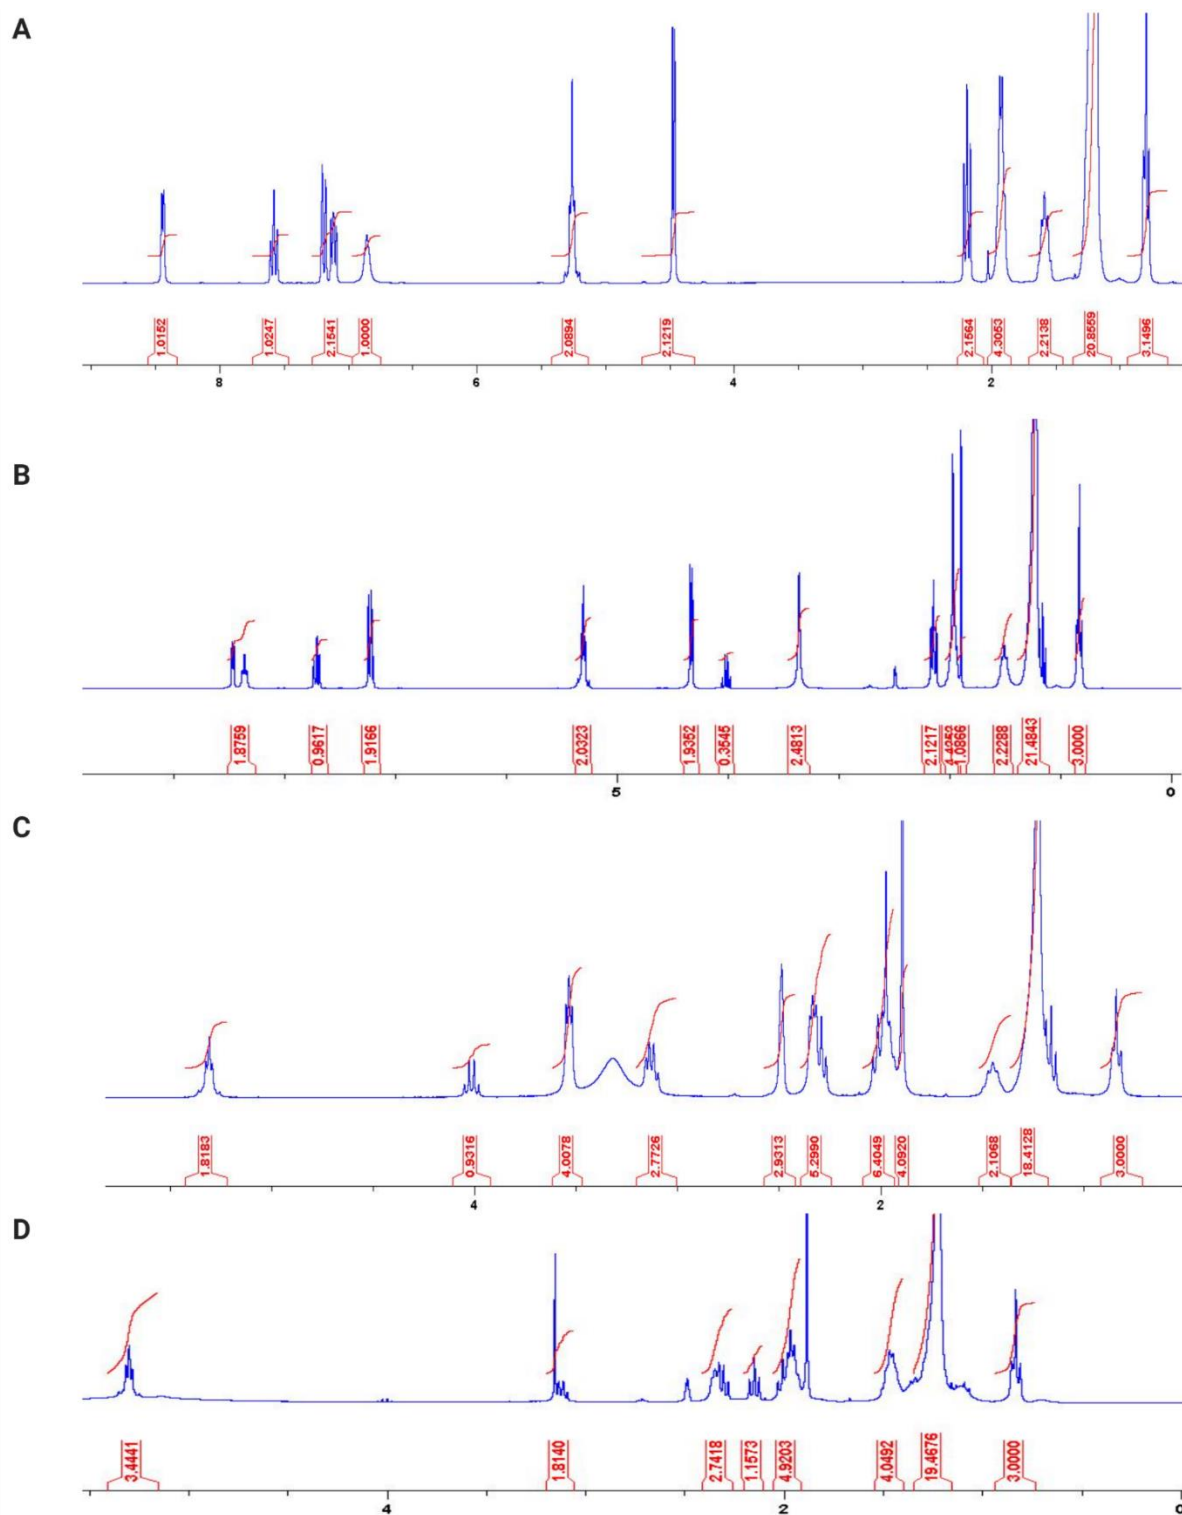

**Figure S1.** Proton NMR spectra for synthesised ionisable amino lipids. A)  $^1\text{H}$  spectra for OAPy-4 B)  $^1\text{H}$  spectra for OAPy-2 C)  $^1\text{H}$  spectra for OAMo-1 and D)  $^1\text{H}$  spectra for OAPi-1.

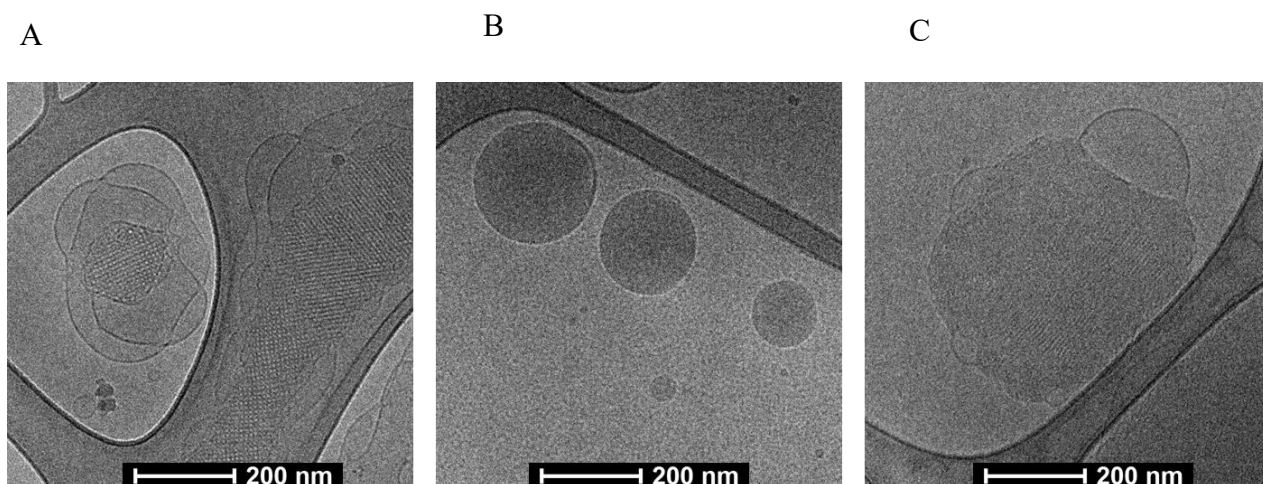

**Figure S2.** Representative cryo-TEM images of lipid nanoparticles consisting of (A) MO-F127, (B) MO- OAPy-4 -F127 at pH 7, and (C) MO- OAPy-4 -F127 at pH 5. The ratio of OAPy-4 to MO in these formulations is 0.4.
